# Supplementary material
Source: publisher site journal article supplement (https://www.dovepress.com/article/410301)
Supplement: Supplementary file 1 [file get_supplementary_file.php]

Updated 18 October 2022

Agents classified as carcinogenic to humans (Group 1) (in red)  
Interventions with sufficient evidence of a cancer-preventive effect (in green)

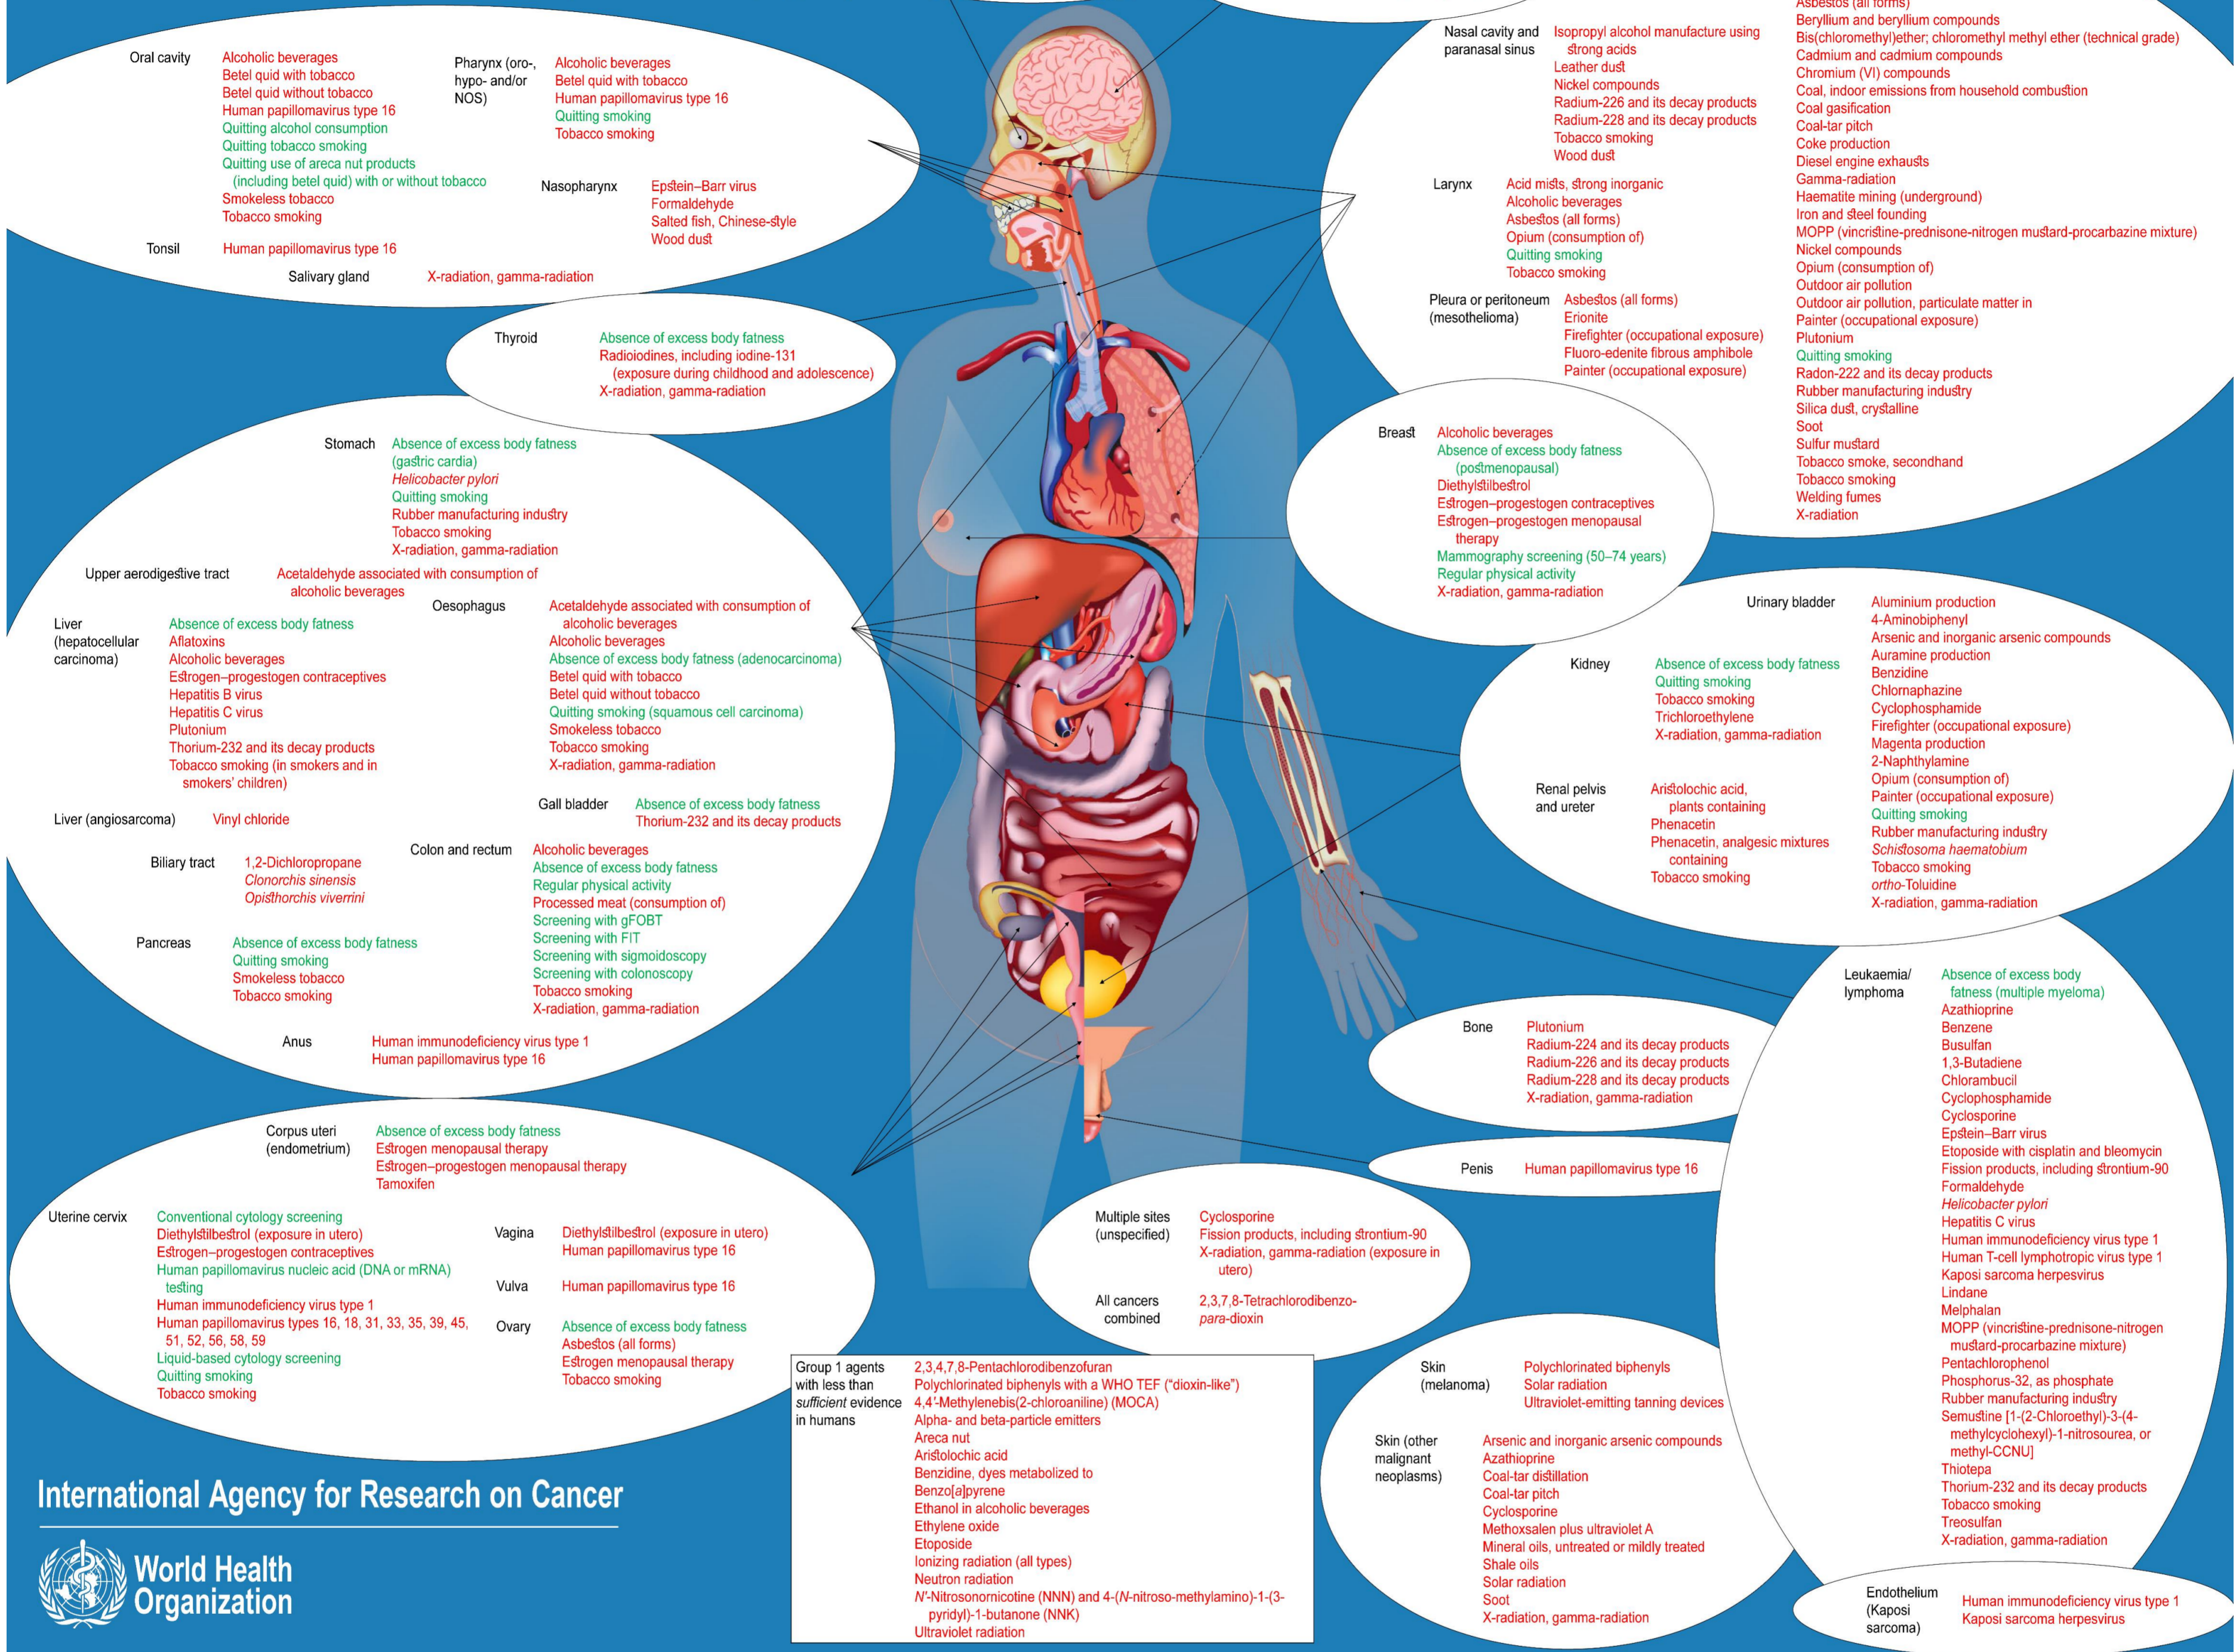

International Agency for Research on Cancer

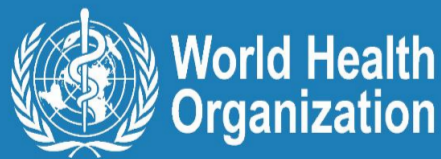

Figure S1. Human Cancer: Known Causes and Prevention by Organ Site. IARC Monographs on the Identification of Carcinogenic Hazards to Humans and Handbooks of Cancer Prevention. **Note:** Reprinted from World Health Organization. © International Agency for Research on Cancer. "Human Cancer: Known Causes and Prevention by Organ Site – IARC Monographs on the Identification of Carcinogenic Hazards to Humans," Update: Oct. 18, 2022. Available from: [https://monographs.iarc.who.int/human\\_cancer\\_known\\_causes\\_and\\_prevention\\_organ\\_site/](https://monographs.iarc.who.int/human_cancer_known_causes_and_prevention_organ_site/). Accessed Jun 16, 2023.
